# Supplementary material for: Induction of mesenchymal stem cell differentiation by co-culturing with mature cells in double-layered 2-methacryloyloxyethyl phosphorylcholine polymer hydrogel matrices
Source: Royal Society of Chemistry journal article supplement (doi:10.1039/d1tb01817e), 2021-11-25
Supplement: d1tb01817e1.pdf [file d1tb01817e1.pdf]

Supplementary information

**Induction of mesenchymal stem cell differentiation by co-culturing with mature cells in double-layered 2-methacryloyloxyethyl phosphorylcholine polymer hydrogel matrices**

Kazuhiko Ishihara<sup>\*a,b</sup>, Miu Kaneyasu<sup>a</sup>, Kyoko Fukazawa<sup>a</sup>, Ren Zhang<sup>b</sup>, Yuji Teramura<sup>b</sup>

<sup>a</sup>Department of Materials Engineering, School of Engineering, The University of Tokyo,

<sup>b</sup>Department of Bioengineering, School of Engineering, The University of Tokyo

7-3-1, Hongo, Bunkyo-ku, Tokyo 113-8656, Japan

\*Corresponding author

Kazuhiko Ishihara

Email: [ishihara@mpc.t.u-tokyo.ac.jp](mailto:ishihara@mpc.t.u-tokyo.ac.jp)

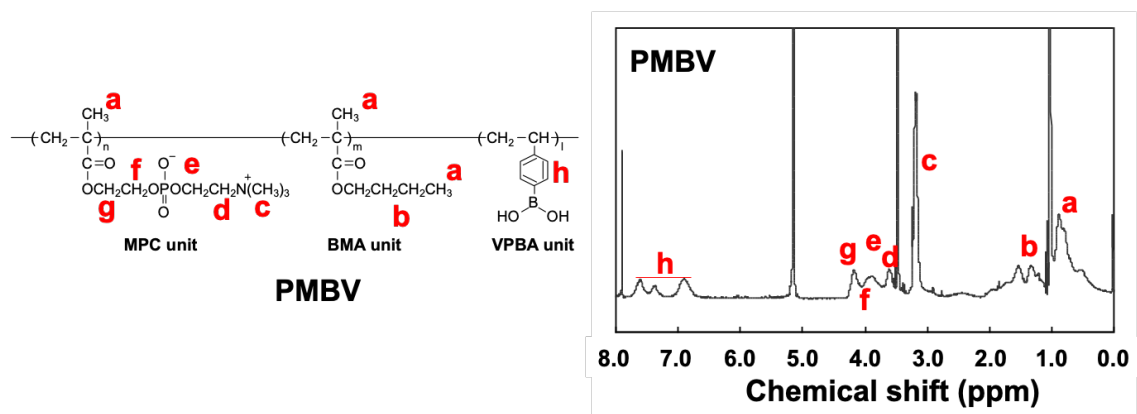

Fig. S1 Representative  $^1H$ -NMR spectrum of PMBV-2 in  $d_6$ -ethanol at 25 °C.

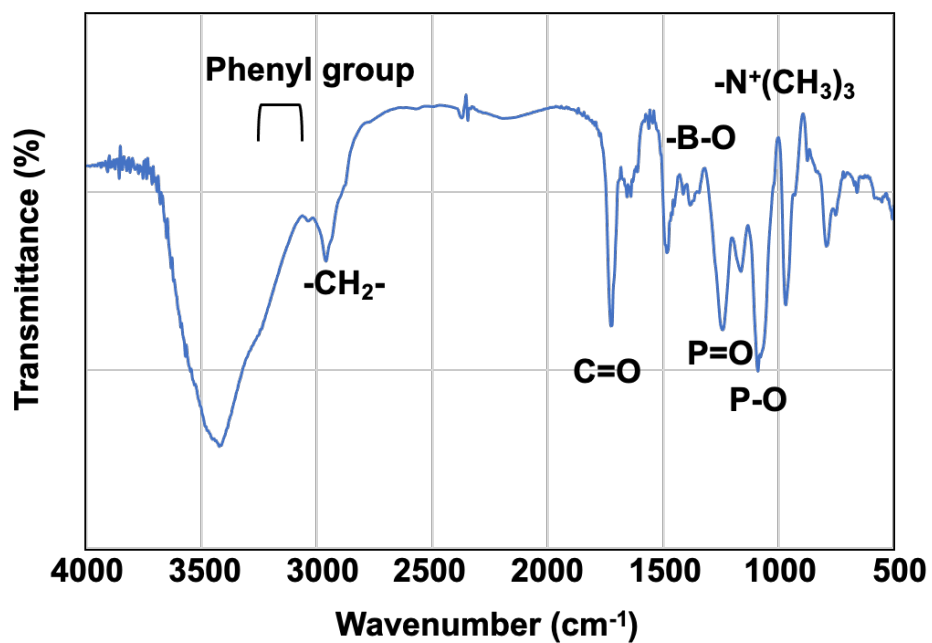

Fig. S2 Representative FT-IR spectrum of PMBV-2.

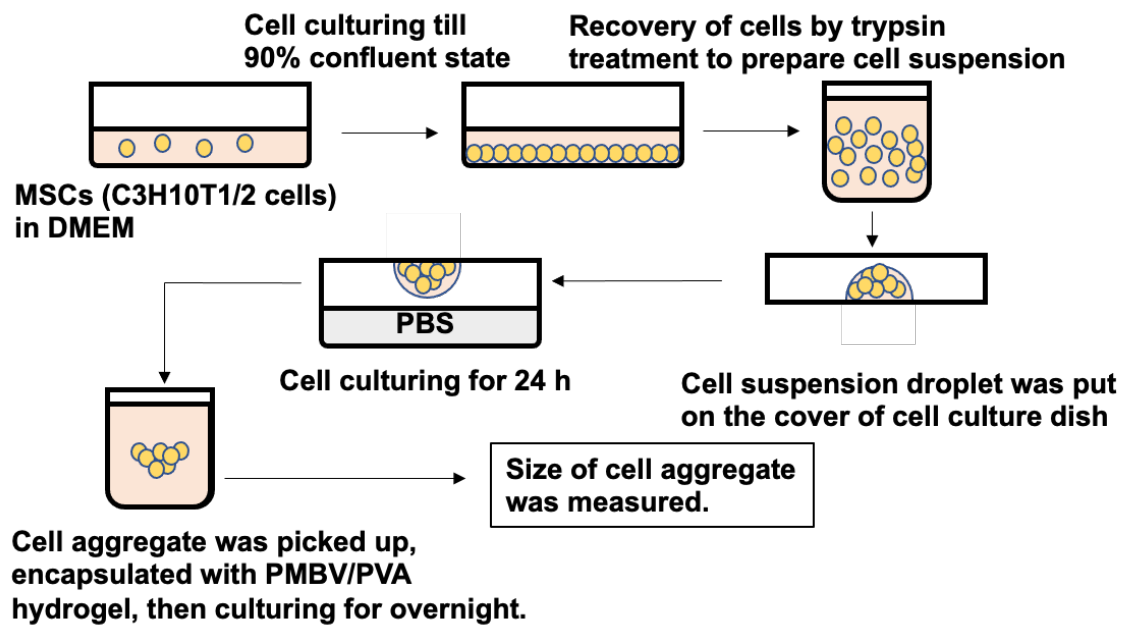

Fig. S3 Procedure of cell aggregate formation by hanging drop method.

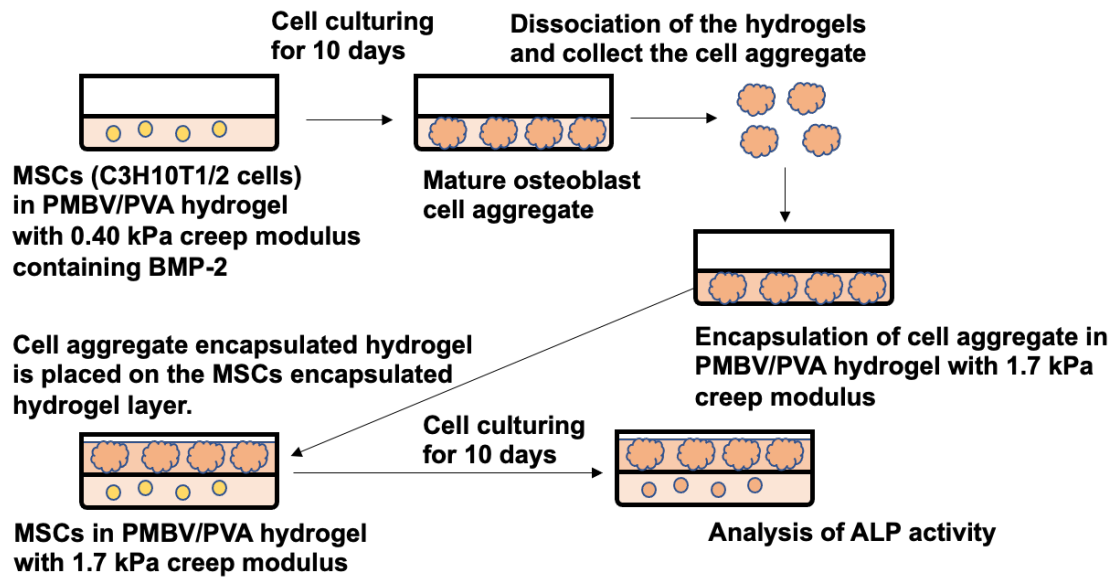

Fig. S4 Schematic of the protocol for the preparation of the double-layered PMBV/PVA hydrogel system containing undifferentiated and differentiated C3H10T1/2 cells. The C3H10T1/2 cells in the PMBV/PVA hydrogel differentiated by the addition of BMP-2 and formed mature osteoblast cell aggregates. The cell aggregates could recover by dissociation of the PMBV/PVA hydrogel. The cell aggregates were encapsulated in the PMBV/PVA hydrogel. The hydrogel was integrated on the other hydrogel containing undifferentiated C3H10T1/2 cells. The ALP activity was analyzed to evaluate the differentiation of cells.

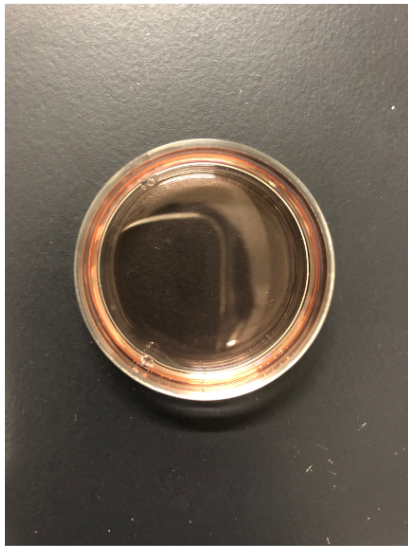

**PMBV-1/PVA hydrogel**

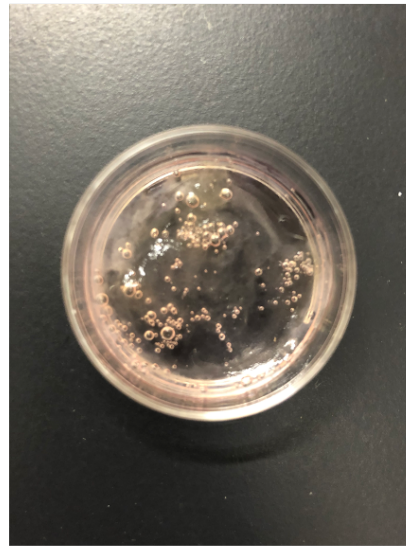

**PMBV-2/PVA hydrogel**

Fig. S5 Optical image of the PMBV/PVA hydrogels. Concentrations of PMBV was 5.0 wt% and PVA was 2.5 wt% in DMEM. Two polymer solutions were mixed together and the solution was pipetting gently several times at room temperature.

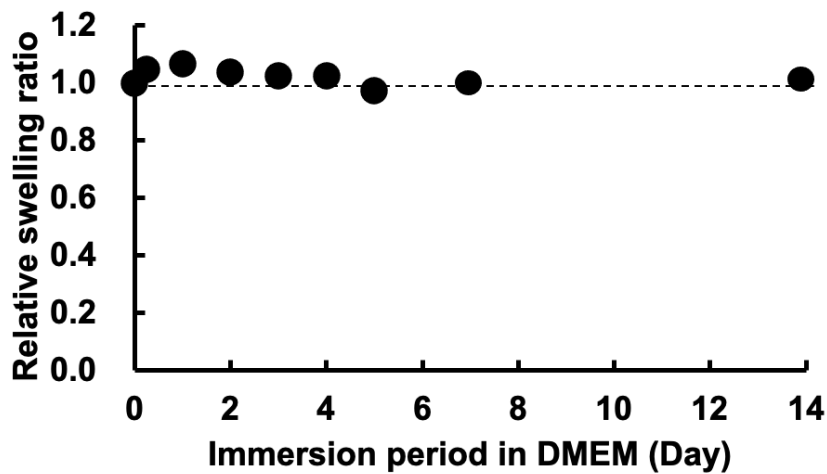

Fig. S6 Swelling stability of the PMBV/PVA hydrogel stored in DMEM at room temperature. Concentrations of PMBV was 5.0 wt% and PVA was 2.5 wt% in DMEM for preparation of PMBV/PVA hydrogel.

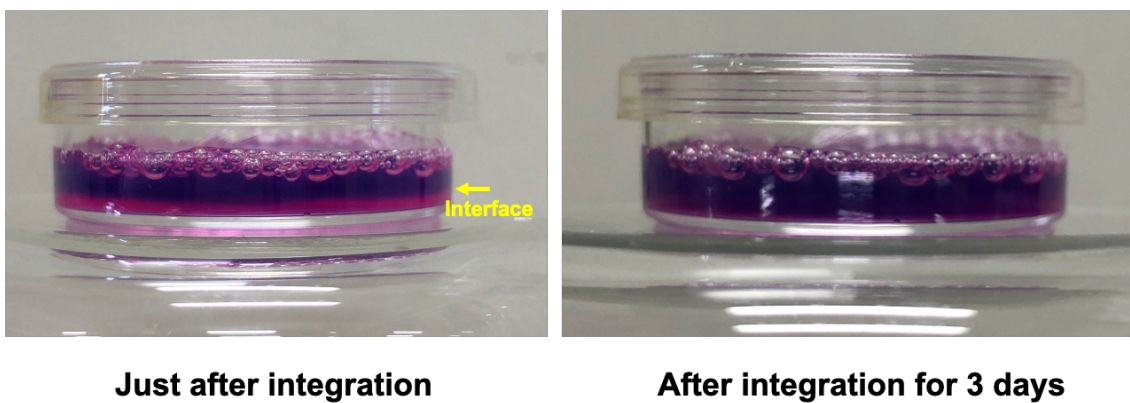

Fig. S7 Adhesion of the PMBV/PVA hydrogel for the preparation of the double-layered hydrogels. Two hydrogel layers were observed by staining the upper layer of the hydrogel immediately after the double-layered hydrogel layer was prepared. The yellow arrow indicates the initial interface between two hydrogel layers. After three days, the border of the two hydrogel layers became unclear.

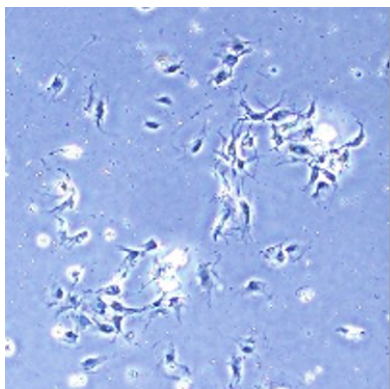

**200  $\mu\text{m}$**

Fig. S8 Phase-contrast microscopy image of differentiated C3H10T1/2 cells stained by a conventional APL staining method.
